# Supplementary material for: Next-Generation Anchor Based Phylogeny (NexABP): Constructing phylogeny from Next-generation sequencing data
Source: PubMed Central journal article supplement — Sci Rep. 2013 Sep 11;3:2634. doi: 10.1038/srep02634 (PMC3769656; doi:10.1038/srep02634), 2013-09-11
Supplement: srep02634-s1.pdf [file srep02634-s1.pdf]

**Next-Generation Anchor Based Phylogeny (NexABP): Constructing phylogeny from Next-generation sequencing data**

Tanmoy Roychowdhury<sup>1</sup>, Anchal Vishnoi<sup>2</sup> and Alok Bhattacharya<sup>1,2\*</sup>

<sup>1</sup>School of Computational and Integrative Sciences, Jawaharlal Nehru University, New Delhi.

<sup>2</sup>School of Life Sciences, Jawaharlal Nehru University, New Delhi.

**Supplementary Figures:**

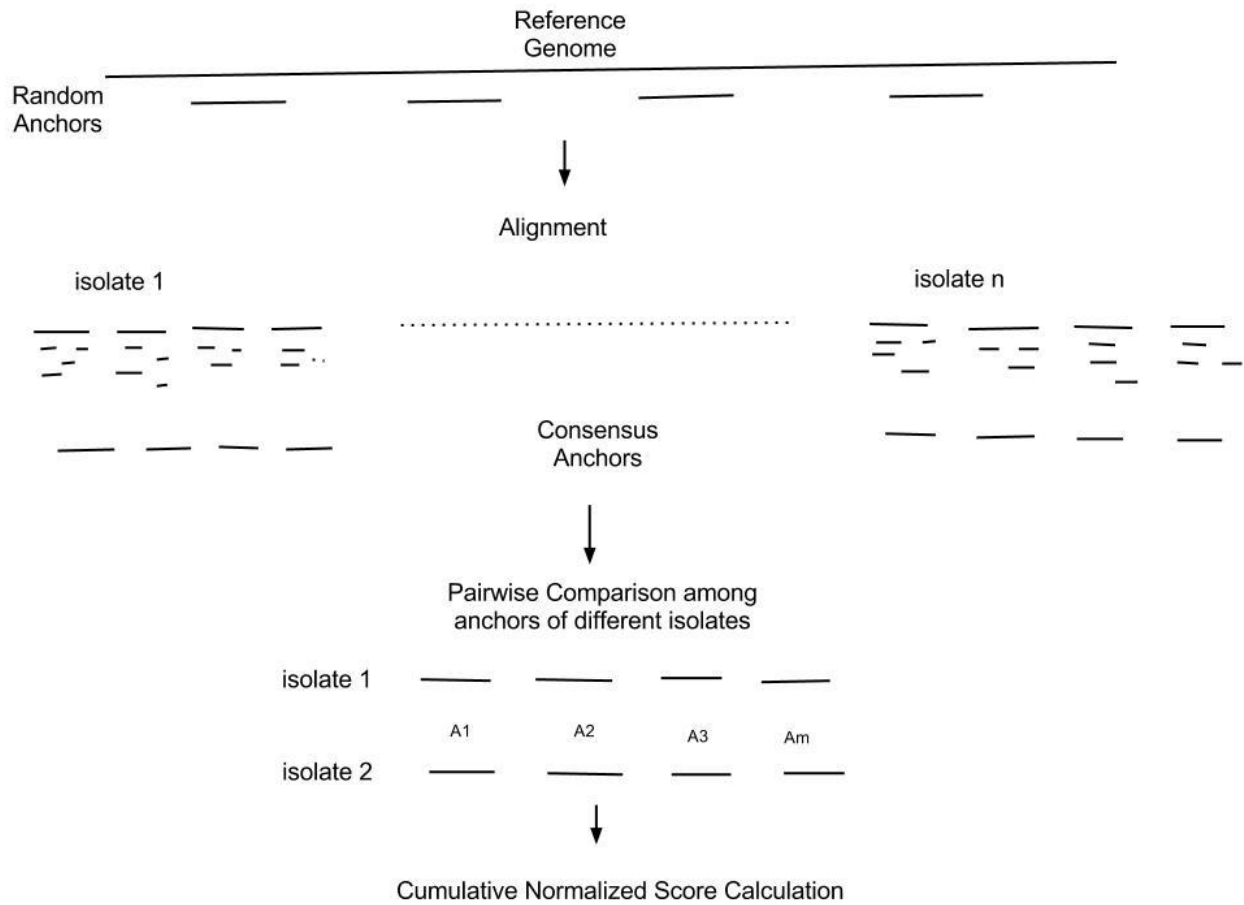

**Figure S1:** A pictorial representation of CNS calculation by NexABP.

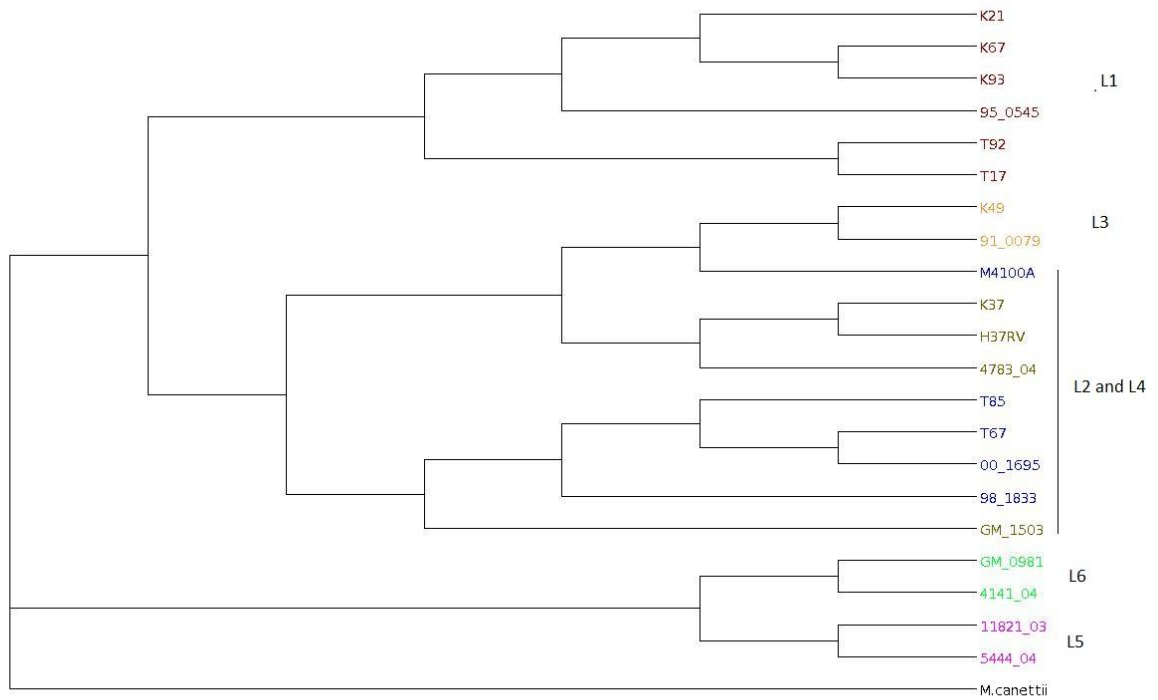

**Figure S2:** NexABP generated phylogenetic tree of *Mycobacterium tuberculosis* isolates. Six major lineages are represented by different colors. *Mycobacterium bovis* genome was used to pick random anchors.

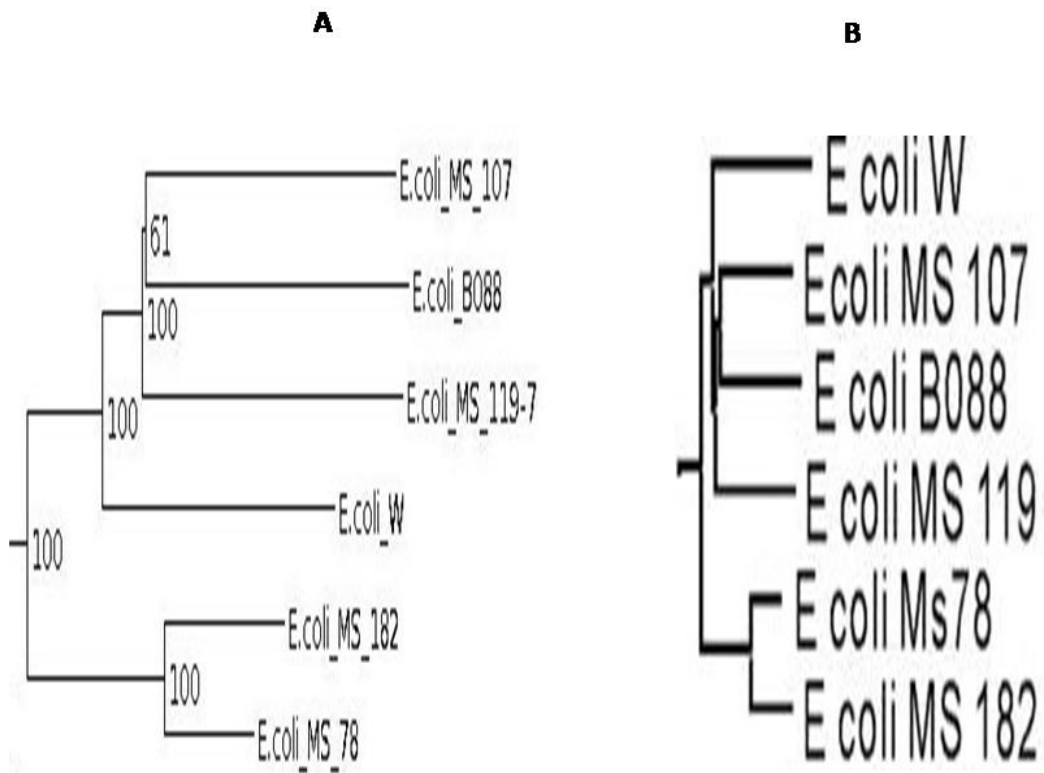

**Figure S3:** A screenshot from (A) NexABP and (B) Co-phylog generated phylogenetic tree of *E.coli*. Lengths of internal branches are much less in Co-phylog generated tree.

1.0E-4

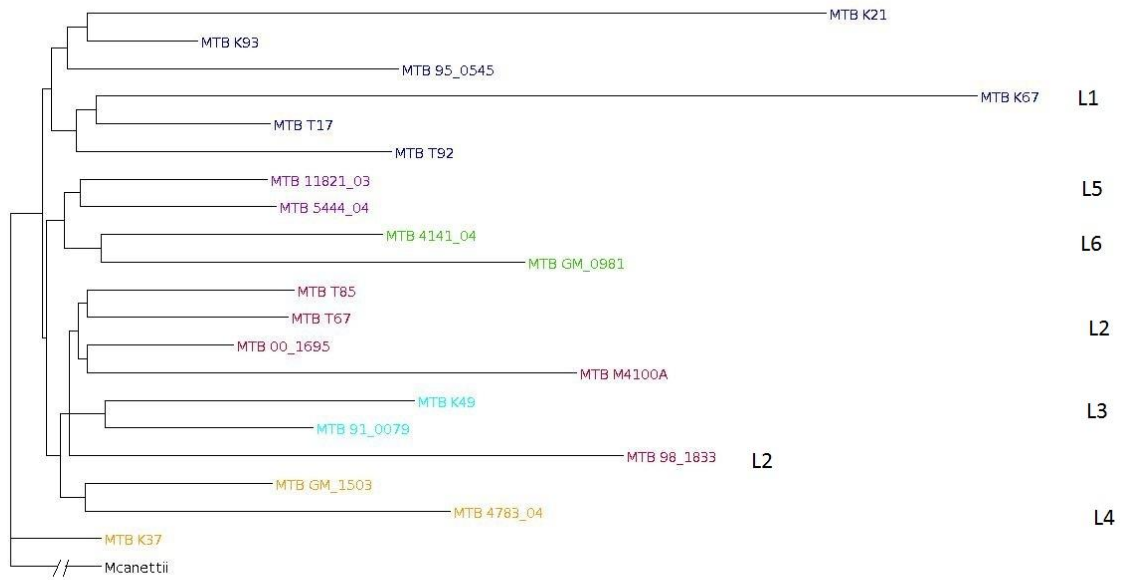

**Figure S4:** CO-phylog generated phylogenetic tree of *Mycobacterium tuberculosis* isolates. Six major lineages are represented by different colors.

### **Supplementary Tables:**

**Table S1:** Tree topology test. The approximately unbiased (AU) test, bootstrap probability (BP), Unweighted and weighted (W) Kishino-Hasegawa (KH) and Shimodaira-Hasegawa (SH) tests were performed.

Tree 1: Tree generated by NexABP

Tree 2: Tree generated by Comas et.al.

| Item   | Obs   | Au   | Np    | Bp    | Pp    | Kh    | Sh    | Wkh   | wsh   |
|--------|-------|------|-------|-------|-------|-------|-------|-------|-------|
| Tree 1 | -60.1 | 0.92 | 0.923 | 0.917 | 1.00  | 0.922 | 0.922 | 0.922 | 0.922 |
| Tree 2 | 60.1  | 0.08 | 0.077 | 0.083 | 8e-27 | 0.078 | 0.078 | 0.078 | 0.078 |
